# Supplementary material for: Synthesis and Fluorescence Properties of a New Heterotrinuclear Co(II)-Ce(III)Complex Constructed from a bis(salamo)-Type Tetraoxime Ligand
Source: MDPI journal article supplement (doi:10.3390/molecules23040804), 2018-03-31

# checkCIF/PLATON report

You have not supplied any structure factors. As a result the full set of tests cannot be run.

THIS REPORT IS FOR GUIDANCE ONLY. IF USED AS PART OF A REVIEW PROCEDURE FOR PUBLICATION, IT SHOULD NOT REPLACE THE EXPERTISE OF AN EXPERIENCED CRYSTALLOGRAPHIC REFEREE.

No syntax errors found.      CIF dictionary      Interpreting this report

## Datablock: d903

---

Bond precision:    C-C = 0.0098 Å

Wavelength=0.71073

Cell:                a=12.0521(5)                b=13.7804(5)                c=15.2909(4)  
                      alpha=95.678(3)            beta=99.471(3)            gamma=90.210(3)  
Temperature:        294 K

|                        | Calculated                                       | Reported                                             |
|------------------------|--------------------------------------------------|------------------------------------------------------|
| Volume                 | 2492.13(15)                                      | 2492.13(15)                                          |
| Space group            | P -1                                             | P -1                                                 |
| Hall group             | -P 1                                             | -P 1                                                 |
| Moiety formula         | 2(C40 H43 Ce Co2 N4 O17),<br>C H2 Cl2, 3(C H4 O) | C40 H43 Ce Co2 N4 O17,<br>0.5(C H2 Cl2), 1.5(C H4 O) |
| Sum formula            | C84 H100 Ce2 Cl2 Co4 N8<br>O37                   | C42 H50 Ce Cl Co2 N4<br>O18.50                       |
| Mr                     | 2400.59                                          | 1200.29                                              |
| Dx, g cm <sup>-3</sup> | 1.600                                            | 1.600                                                |
| Z                      | 1                                                | 2                                                    |
| Mu (mm <sup>-1</sup> ) | 1.685                                            | 1.685                                                |
| F000                   | 1214.0                                           | 1214.0                                               |
| F000'                  | 1215.74                                          |                                                      |
| h,k,lmax               | 14,16,18                                         | 14,16,18                                             |
| Nref                   | 9481                                             | 9461                                                 |
| Tmin,Tmax              |                                                  | 0.879,1.000                                          |
| Tmin'                  |                                                  |                                                      |

Correction method= # Reported T Limits: Tmin=0.879 Tmax=1.000  
AbsCorr = MULTI-SCAN

Data completeness= 0.998

Theta(max)= 25.677

R(reflections)= 0.0519( 7494)

wR2(reflections)= 0.1537( 9461)

S = 1.025

Npar= 649

---

The following ALERTS were generated. Each ALERT has the format

**test-name\_ALERT\_alert-type\_alert-level.**

Click on the hyperlinks for more details of the test.

### ● Alert level C

|                   |                                                  |              |
|-------------------|--------------------------------------------------|--------------|
| PLAT053_ALERT_1_C | Minimum Crystal Dimension Missing (or Error) ... | Please Check |
| PLAT054_ALERT_1_C | Medium Crystal Dimension Missing (or Error) ...  | Please Check |
| PLAT055_ALERT_1_C | Maximum Crystal Dimension Missing (or Error) ... | Please Check |
| PLAT220_ALERT_2_C | Non-Solvent Resd 1 C Ueq(max)/Ueq(min) Range     | 5.6 Ratio    |
| PLAT222_ALERT_3_C | Non-Solv. Resd 1 H Uiso(max)/Uiso(min) Range     | 5.6 Ratio    |
| PLAT230_ALERT_2_C | Hirshfeld Test Diff for C1 --C2                  | 6.3 s.u.     |
| PLAT234_ALERT_4_C | Large Hirshfeld Difference O9 --C23              | 0.16 Ang.    |
| PLAT241_ALERT_2_C | High 'MainMol' Ueq as Compared to Neighbors of   | C25 Check    |
| PLAT242_ALERT_2_C | Low 'MainMol' Ueq as Compared to Neighbors of    | Co2 Check    |
| PLAT242_ALERT_2_C | Low 'MainMol' Ueq as Compared to Neighbors of    | C33 Check    |
| PLAT342_ALERT_3_C | Low Bond Precision on C-C Bonds .....            | 0.00985 Ang. |
| PLAT412_ALERT_2_C | Short Intra XH3 .. XHn H35A ..H36B ..            | 1.88 Ang.    |
| PLAT412_ALERT_2_C | Short Intra XH3 .. XHn H36B ..H38B ..            | 1.84 Ang.    |
| PLAT414_ALERT_2_C | Short Intra D-H..H-X H13 ..H35B ..               | 1.96 Ang.    |

### ● Alert level G

|                   |                                                           |              |
|-------------------|-----------------------------------------------------------|--------------|
| PLAT002_ALERT_2_G | Number of Distance or Angle Restraints on AtSite          | 7 Note       |
| PLAT003_ALERT_2_G | Number of Uiso or Uij Restrained non-H Atoms ...          | 10 Report    |
| PLAT007_ALERT_5_G | Number of Unrefined Donor-H Atoms .....                   | 3 Report     |
| PLAT012_ALERT_1_G | No _shelx_res_checksum Found in CIF .....                 | Please Check |
| PLAT042_ALERT_1_G | Calc. and Reported MoietyFormula Strings Differ           | Please Check |
| PLAT045_ALERT_1_G | Calculated and Reported Z Differ by a Factor ...          | 0.50 Check   |
| PLAT154_ALERT_1_G | The s.u.'s on the Cell Angles are Equal ..(Note)          | 0.003 Degree |
| PLAT172_ALERT_4_G | The CIF-Embedded .res File Contains DFIX Records          | 6 Report     |
| PLAT186_ALERT_4_G | The CIF-Embedded .res File Contains ISOR Records          | 3 Report     |
| PLAT187_ALERT_4_G | The CIF-Embedded .res File Contains RIGU Records          | 2 Report     |
| PLAT300_ALERT_4_G | Atom Site Occupancy of Cl1 Constrained at                 | 0.5 Check    |
| PLAT300_ALERT_4_G | Atom Site Occupancy of Cl2 Constrained at                 | 0.5 Check    |
| PLAT300_ALERT_4_G | Atom Site Occupancy of C41 Constrained at                 | 0.5 Check    |
| PLAT300_ALERT_4_G | Atom Site Occupancy of H41A Constrained at                | 0.5 Check    |
| PLAT300_ALERT_4_G | Atom Site Occupancy of H41B Constrained at                | 0.5 Check    |
| PLAT300_ALERT_4_G | Atom Site Occupancy of O18 Constrained at                 | 0.5 Check    |
| PLAT300_ALERT_4_G | Atom Site Occupancy of C42 Constrained at                 | 0.5 Check    |
| PLAT300_ALERT_4_G | Atom Site Occupancy of H18A Constrained at                | 0.5 Check    |
| PLAT300_ALERT_4_G | Atom Site Occupancy of H42A Constrained at                | 0.5 Check    |
| PLAT300_ALERT_4_G | Atom Site Occupancy of H42B Constrained at                | 0.5 Check    |
| PLAT300_ALERT_4_G | Atom Site Occupancy of H42C Constrained at                | 0.5 Check    |
| PLAT302_ALERT_4_G | Anion/Solvent/Minor-Residue Disorder (Resd 2 )            | 100% Note    |
| PLAT302_ALERT_4_G | Anion/Solvent/Minor-Residue Disorder (Resd 3 )            | 100% Note    |
| PLAT304_ALERT_4_G | Non-Integer Number of Atoms in ..... Resd 2               | 2.50 Check   |
| PLAT333_ALERT_2_G | Large Aver C6-Ring C-C Dist. C12 -C28                     | 1.42 Ang.    |
| PLAT343_ALERT_2_G | Unusual sp3 Angle Range in Main Residue for               | C35 Check    |
| PLAT395_ALERT_2_G | Deviating X-O-Y Angle From 120 for O4                     | 111.2 Degree |
| PLAT395_ALERT_2_G | Deviating X-O-Y Angle From 120 for O5                     | 110.9 Degree |
| PLAT395_ALERT_2_G | Deviating X-O-Y Angle From 120 for O9                     | 111.2 Degree |
| PLAT395_ALERT_2_G | Deviating X-O-Y Angle From 120 for O10                    | 109.5 Degree |
| PLAT432_ALERT_2_G | Short Inter X...Y Contact C11 ..C36                       | 2.95 Ang.    |
| PLAT790_ALERT_4_G | Centre of Gravity not Within Unit Cell: Resd. #<br>C H4 O | 4 Note       |
| PLAT860_ALERT_3_G | Number of Least-Squares Restraints .....                  | 60 Note      |

0 **ALERT level A** = Most likely a serious problem - resolve or explain

0 **ALERT level B** = A potentially serious problem, consider carefully

14 **ALERT level C** = Check. Ensure it is not caused by an omission or oversight  
33 **ALERT level G** = General information/check it is not something unexpected

7 ALERT type 1 CIF construction/syntax error, inconsistent or missing data  
17 ALERT type 2 Indicator that the structure model may be wrong or deficient  
3 ALERT type 3 Indicator that the structure quality may be low  
19 ALERT type 4 Improvement, methodology, query or suggestion  
1 ALERT type 5 Informative message, check

---

It is advisable to attempt to resolve as many as possible of the alerts in all categories. Often the minor alerts point to easily fixed oversights, errors and omissions in your CIF or refinement strategy, so attention to these fine details can be worthwhile. In order to resolve some of the more serious problems it may be necessary to carry out additional measurements or structure refinements. However, the purpose of your study may justify the reported deviations and the more serious of these should normally be commented upon in the discussion or experimental section of a paper or in the "special\_details" fields of the CIF. checkCIF was carefully designed to identify outliers and unusual parameters, but every test has its limitations and alerts that are not important in a particular case may appear. Conversely, the absence of alerts does not guarantee there are no aspects of the results needing attention. It is up to the individual to critically assess their own results and, if necessary, seek expert advice.

### **Publication of your CIF in IUCr journals**

A basic structural check has been run on your CIF. These basic checks will be run on all CIFs submitted for publication in IUCr journals (*Acta Crystallographica*, *Journal of Applied Crystallography*, *Journal of Synchrotron Radiation*); however, if you intend to submit to *Acta Crystallographica Section C* or *E* or *IUCrData*, you should make sure that full publication checks are run on the final version of your CIF prior to submission.

### **Publication of your CIF in other journals**

Please refer to the *Notes for Authors* of the relevant journal for any special instructions relating to CIF submission.

---

**PLATON version of 13/12/2017; check.def file version of 12/12/2017**

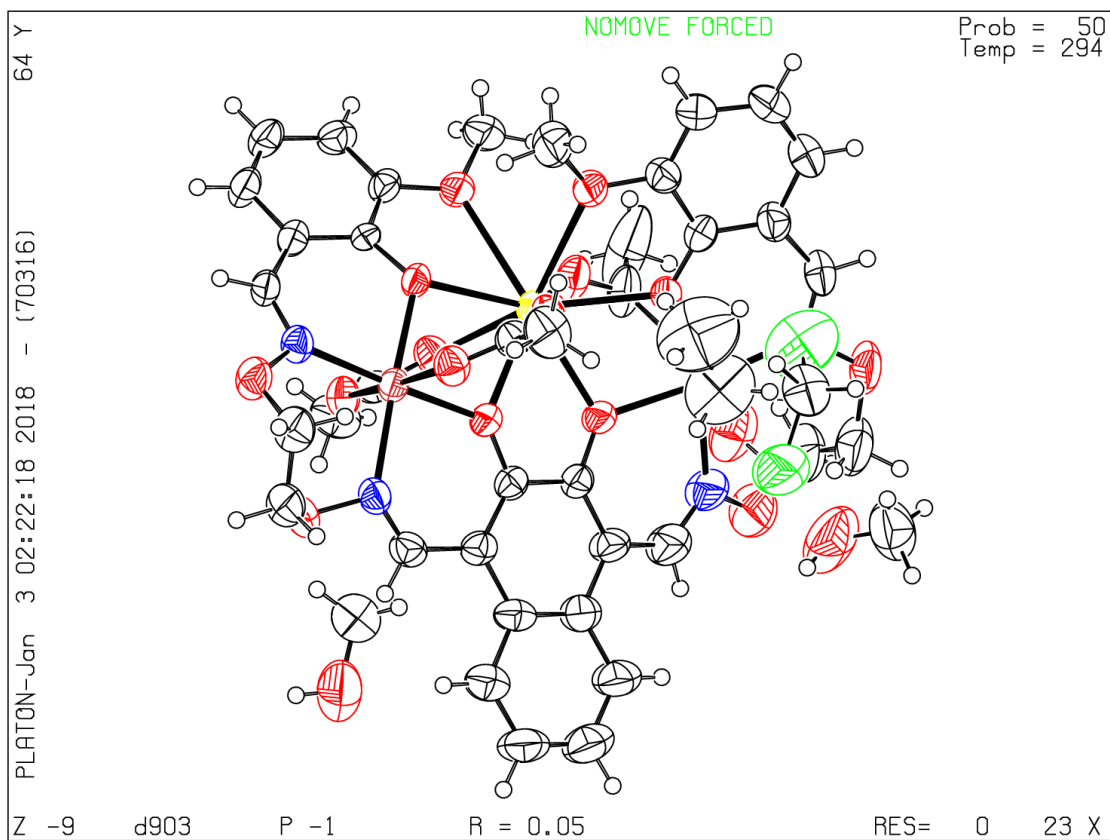

Supplement: s1 [file s1]
